# Supplementary material
Source: PubMed Central journal article supplement (PMC3122941)
Supplement: supp_blood-2011-01-331173_Document1.pdf [file supp_blood-2011-01-331173_Document1.pdf]

Table S1. Mouse information for Fig. 5

| Experiment    | Mouse ID | WPT <sup>a</sup> | Donor <sup>b</sup> | %CD45+ <sup>c</sup> |
|---------------|----------|------------------|--------------------|---------------------|
| Mock          | 94       | 16               | A                  | 19                  |
|               | 95       | 16               | A                  | 27                  |
|               | 107      | 16               | A                  | 29                  |
|               | 132      | 17               | B                  | 43                  |
|               | 136      | 15               | C                  | 45                  |
|               | 138      | 15               | D                  | 21                  |
|               | 142      | 19               | D                  | 33                  |
|               | 144      | 19               | D                  | 23                  |
|               | 228      | 14               | E                  | 43                  |
|               | 229      | 13               | E                  | 40                  |
|               | 230      | 13               | E                  | 58                  |
|               | 231      | 15               | E                  | 68                  |
|               | 369      | 16               | F                  | 54                  |
|               | 370      | 16               | F                  | 39                  |
|               | 371      | 16               | F                  | 47                  |
|               | 372      | 17               | G                  | 59                  |
|               | 373      | 17               | G                  | 52                  |
|               | 378      | 16               | G                  | 23                  |
|               | 379      | 16               | G                  | 68                  |
|               | 380      | 16               | G                  | 11                  |
| 381           | 16       | G                | 29                 |                     |
| 382           | 16       | G                | 16                 |                     |
| 383           | 16       | G                | 16                 |                     |
| HIV<br>(1wpi) | 93       | 16               | A                  | 29                  |
|               | 97       | 16               | A                  | 16                  |
|               | 99       | 16               | A                  | 16                  |
|               | 140      | 19               | D                  | 22                  |
|               | 141      | 19               | D                  | 46                  |
|               | 238      | 14               | E                  | 52                  |
|               | 239      | 14               | E                  | 34                  |
|               | 365      | 16               | F                  | 59                  |
|               | 366      | 16               | F                  | 40                  |
|               | 367      | 16               | F                  | 46                  |
| HIV<br>(2wpi) | 235      | 15               | E                  | 36                  |
|               | 236      | 15               | E                  | 37                  |
|               | 237      | 15               | E                  | 32                  |
|               | 374      | 16               | G                  | 31                  |
|               | 375      | 16               | G                  | 42                  |
|               | 376      | 16               | G                  | 35                  |
|               | 377      | 16               | G                  | 38                  |

a: weeks post transplant at termination time

b: donor fetal liver tissues

c: percent human CD45+ cells in the peripheral blood at 12-16 WPT

## Bone Marrow

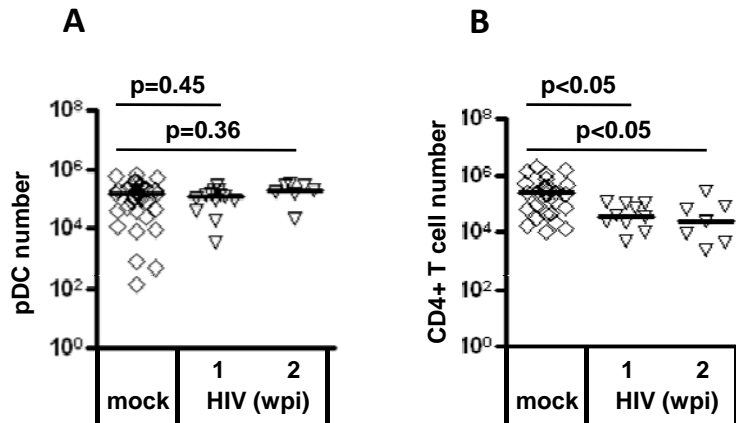

## Spleen

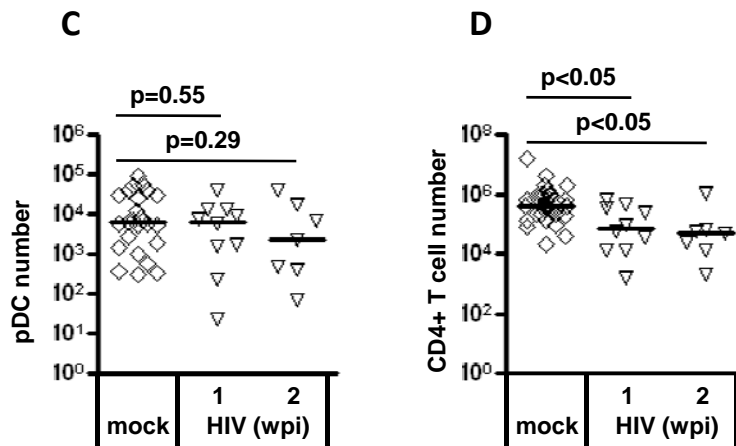

**Fig. S1. Differential depletion of CD4+ T cells and pDCs in HIV infected DKO-hu mice**

pDC and CD4+ T cell numbers were calculated by total cell number from Guava cell counts and percentage of total cells from flow cytometry analysis. Bone marrow cells were collected from both femur and tibia. (A) pDC numbers in bone marrow. (B) CD4+ T cell counts in bone marrow. (C) pDC numbers in spleen. (D) CD4+ T cell counts in spleen. p values shown on each plot were calculated with Mann-Whitney U test.
